# Supplementary material for: Synthesis and characterisation of a ligand that forms a stable tetrahedral intermediate in the active site of the Aureobacterium species (–)γ-lactamase
Source: Royal Society of Chemistry journal article supplement (doi:10.1039/b511078e), 2005-01-01
Supplement: b511078e_1.pdf [file b511078e_1.pdf]

Commercially available reagents were used throughout without further purification unless otherwise stated; solvents were dried using standard procedures. Reactions were routinely carried out under a nitrogen atmosphere. Analytical thin layer chromatography was carried out using aluminum backed plates coated with Merck Kieselgel 60 GF<sub>254</sub>. Plates were visualised under UV light (at 254 and /or 360 nm) and stained with KMnO<sub>4</sub> solution. Flash chromatography was carried out using Merck Kieselgel 60 H silica or Matrix silica 60. Fully characterised compounds were chromatographically homogeneous. <sup>1</sup>H and <sup>13</sup>C NMR spectra were recorded using Bruker 300 and 400 MHz instruments (<sup>1</sup>H frequencies, corresponding <sup>13</sup>C frequencies are 75 and 100 MHz); *J* values are in Hz. High and low-resolution mass spectra were recorded on a Micromass GCT time of flight high resolution mass spectrometer. Elemental analysis was carried out on a Perkin Elmer 2400 CHN analyser to within ± 0.3% of the theoretical values. Melting points were determined on a Reichert-Kofler hot stage apparatus and are uncorrected.

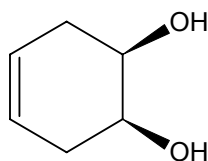

### 4-Cyclohexene-*cis*-1,2-diol

To a mixture of *N*-methylmorpholine-*N*-oxide (2.5g, 21.4mmols) in water (6ml), acetone (3ml) and osmium tetroxide (20mg) in *tert*-butanol was added 1,4-Cyclohexdiene (2ml, 21.4mmol). The reaction was maintained at room temperature with a water bath and stirred overnight under nitrogen. To the reaction mixture was added sodium hydrosulfite (1g) and flurosil (8g) in water (20ml) and stirred for 30 min then filtered. The filtrate was neutralized (pH 7) with 1N H<sub>2</sub>SO<sub>4</sub>, the acetone was evaporated *in vacuo*, the filtrate was then further adjusted to pH 2. The solution was saturated with NaCl and extracted with ethyl acetate (3 x 100ml), the combined organic layers were dried (Na<sub>2</sub>SO<sub>4</sub>), evaporated *in vacuo* and purified by flash chromatography on silica, eluting with ethyl acetate-hexane (1:1) to afford 4-Cyclohexene-*cis*-1,2-diol (2.05g, 84%) as a colorless crystalline solid mp 70-73°C (from EtOH) (lit., 69-70); (found C, 61.9; H, 8.6; N, 0. calc. for C<sub>6</sub>H<sub>10</sub>O<sub>2</sub>, requires C, 63.1; H, 8.8; N, 0 %); δ<sub>H</sub> (300MHz; CDCl<sub>3</sub>: Me<sub>4</sub>Si) 5.51 (m, 2H) 3.88 (dt 2H, *J* 1.15, 4.92) 2.22 (m, 4H); δ<sub>C</sub> (75MHz; CDCl<sub>3</sub>: Me<sub>4</sub>Si) 124.00 (C), 69.29 (C), 31.34 (C); *m/z* [found M<sup>+</sup> 115.0759. C<sub>6</sub>H<sub>10</sub>O<sub>2</sub> requires 115.1424. C<sub>6</sub>H<sub>10</sub>O<sub>2</sub>]

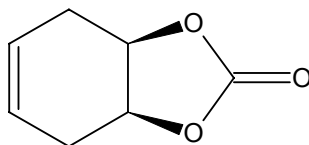

**(3aR,7aS)-3a,4,7,7a-tetrahydrobenzo-[1,3]-dioxol-2-one**

4-Cyclohexene-cis-1,2-diol (1g, 8.76mmol) was dissolved in 20ml of diethyl carbonate and the mixture was refluxed for 1 h. The reaction mixture was concentrated *in vacuo* and the residue purified by flash chromatography on silica eluting with ethyl acetate-light petroleum (3:1) and crystallized from ether to give (3aR,7aS)-3a,4,7,7a-tetrahydro-1,3-benzodioxol-2-one (1.13g, 92%) as colourless needles mp 53-54°C (found C, 59.91; H, 5.71; N, 0. calc. for C<sub>7</sub>H<sub>8</sub>O<sub>3</sub>, requires C, 59.99; H, 5.75; N, 0 %);  $\delta_{\text{H}}$  (300MHz; CDCl<sub>3</sub>: Me<sub>4</sub>Si) 6.10 (m, 2H) 5.15 (m, 2H) 2.56 and (q, 4H, J 111.4, 15.1);  $\delta_{\text{C}}$  (75MHz; CDCl<sub>3</sub>: Me<sub>4</sub>Si) 155 (C), 126.05 (C), 75.11 (C) and 27.37 (C); *m/z* [found M<sup>+</sup> 141.063 C<sub>7</sub>H<sub>8</sub>O<sub>3</sub> requires 141.136. C<sub>7</sub>H<sub>8</sub>O<sub>3</sub>].
