# Supplementary material for: Synthesis and characterisation of a ligand that forms a stable tetrahedral intermediate in the active site of the Aureobacterium species (–)γ-lactamase
Source: Royal Society of Chemistry journal article supplement (doi:10.1039/b511078e), 2005-01-01
Supplement: b511078e_2.pdf [file b511078e_2.pdf]

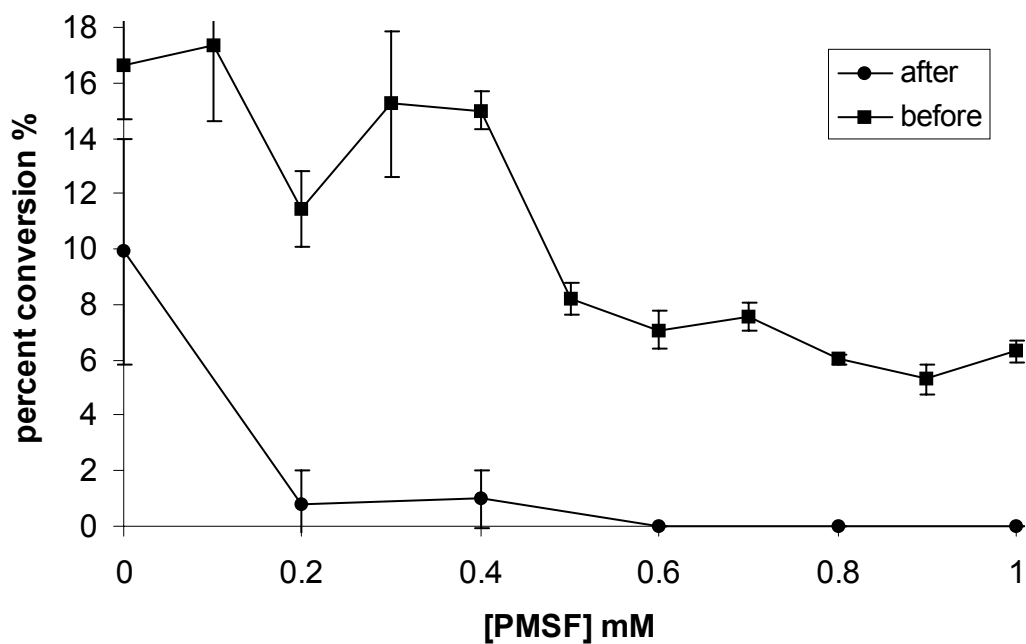

Graph depicting % conversion of the  $\gamma$ -lactam substrate in the presence of varying concentrations of PMSF before and after catalytic turnover.
